# Supplementary material for: α-Crystallin chaperone mimetic drugs inhibit lens γ-crystallin aggregation: Potential role for cataract prevention
Source: PubMed Central journal article supplement (PMC9525908; doi:10.1016/j.jbc.2022.102417), 2022-08-28
Supplement: mmc1.pdf [file mmc1.pdf]

## Supporting Information for

### **$\alpha$ -Crystallin chaperone mimetic drugs inhibit lens $\gamma$ -crystallin aggregation: potential role for cataract prevention**

Sidra Islam<sup>1</sup>, Michael Do<sup>1</sup>, Brett S. Frank<sup>1</sup>, Grant L. Hom<sup>1</sup>, Samuel Wheeler<sup>2</sup>, Hisashi Fujioka<sup>3</sup>, Benlian Wang<sup>4</sup>, Geeta Minocha<sup>1</sup>, David R Sell<sup>1</sup>, Xingjun Fan<sup>5</sup>, Kirsten J. Lampi<sup>2</sup>, Vincent M. Monnier<sup>1, 6</sup>

1Dept of Pathology, Case Western Reserve University, Cleveland, OH 44106,

2Dept of Integrative Biosciences, Oregon Health & Sciences University, Portland, OR 97239,

3Cryo-EM Core Facility, School of Medicine, Case Western Reserve University, Case Western Reserve University, Cleveland, OH 44106,

4Center for Proteomics, Dept. of Nutrition, Case Western Reserve University, Cleveland, OH 44106

5Dept of Cell Biology and Anatomy, Augusta University, Georgia, GA 30912,

6Dept of Biochemistry, Case Western Reserve University, Cleveland OH 44106

#### **Content:**

**Table S1.** Ranking of the top six drug candidates by efficacy of turbidity suppression based on mean of all experiments in Table II.

**Table S2.** Radius of the aggregates of WT-H $\gamma$ D with and without drug C, G and M at the end point of thermal stress (72 °C, 20 min) as observed from DLS spectra

**Table S3.** Percent inhibition in the binding of bis-ANS by drugs in H $\gamma$ D, M $\gamma$ S and OPJ- M $\gamma$ S

**Table S4.** List of primers used for making WT-H $\gamma$ D mutants

**Table S5.** Percent inhibition in heat mediated aggregation of WT-M $\gamma$ S and OPJ-M $\gamma$ S by 500  $\mu$ M of candidate inhibitor drugs at the end point of turbidity assay (72 °C, 20 min)

**Table S6.** Radius of the aggregates of WT-M $\gamma$ S with and without drug C, G and M at the end point of thermal stress (72 °C, 20 min) as observed from DLS spectra

**Table S7.** Radius of the aggregates of OPJ-M $\gamma$ S with and without drug C, G and M at the end point of thermal stress (72 °C, 20 min) as observed from DLS spectra

**Table S8.** Melting temperatures of WT-M $\gamma$ S and OPJ- M $\gamma$ S with and without drug C, G and M calculated from the thermal unfolding curves. N-ter and C-ter refer to N- and C-terminal domain

**Table S9.** Trypsin miscleavage sites detected in H $\gamma$ D incubated with Drug G compared to no drug treatment

**Table S10.** Summary of screen compounds whose activity either worsened or improved the H<sub>2</sub>O<sub>2</sub> mediated aggregation of bovine total gamma crystallins with or without added thermal stress

**Figure S1.** Representative Sephadex G-200 gel filtration profile of bovine lens extract and effect of concentration on the ability of candidate drugs to inhibit thermal induced aggregation of recombinant human  $\gamma$ D crystallin (WT-H $\gamma$ D) and bovine  $\gamma$ -crystallin-rich Pool 4

**Figure S2.** SDS-Page and western blot of purified WT-H $\gamma$ D and its mutants W43R, R58H, R14C, and far- and near-UV CD spectra of WT-H $\gamma$ D with and without drugs

**Figure S3.** SDS-Page and western blot of WT-M $\gamma$ S and its mutant OPJ-M $\gamma$ S

**Figure S4.** Effects of Closantel, Gambogic acid and other drugs on the biophysical and morphological properties of total mouse gamma crystallins, WT-M $\gamma$ S and its mutant OPJ-M $\gamma$ S exposed to oxidative and thermal stress

**Figure S5.** Fluorescence emission spectra, Stern-Volmer plot and modified Stern-Volmer plot of tryptophan fluorescence quenching of WT-H $\gamma$ D

**Figure S6.** Fluorescence emission spectra, b) Stern-Volmer plot and c) modified Stern-Volmer plot of tryptophan fluorescence quenching of WT-M $\gamma$ S

**Figure S7.** Role of the protein concentration on crystallin aggregation and its potential suppression by Drugs C, G and A: a warning

**Table S1:** Ranking of the top six drug candidates by efficacy of aggregation suppression based on mean of all experiments in Table II.

| Drug | % suppression (n=9)        | (%) mean +/- SD |
|------|----------------------------|-----------------|
| C    | 60/73/65/73/71/77/70/52/76 | 68.6 8.2        |
| G    | 48/75/69/75/46/73/55/48/89 | 64.2 15.4       |
| X    | 30/55/61/47/68/60/60/50/71 | 55.8 12.3       |
| D    | 40/44/66/78/61/76/59/30/32 | 54.0 18.1       |
| B    | 23/54/63/60/60/51/57/25/46 | 48.8 14.9       |
| M    | 40/16/38/73/39/48/55/25/46 | 42.2 16.5       |

Note: Drug T appeared only once among the top six candidates and was not further considered.

**Table S2:** Radius of the aggregates of WT-H $\gamma$ D with and without drug C, G and M at the end point of thermal stress (72 °C, 20 min) as observed from DLS spectra

| Sample        | Radius (nm) |        |        | Percent Mass |        |        |
|---------------|-------------|--------|--------|--------------|--------|--------|
|               | Peak 1      | Peak 2 | Peak 3 | Peak 1       | Peak 2 | Peak 3 |
| CON (No Heat) | 2.3         | 9.4    | 51     | 99.2         | 0.7    | 0.1    |
| CON (Heat)    | 22.9        | 409.1  | 7261   | 2.6          | 19.2   | 78.3   |
| C             | 30.5        | -      | -      | 100          | -      | -      |
| G             | 84.9        | -      | -      | 100          | -      | -      |
| M             | 10.9        | 568.5  | -      | 12.7         | 87.3   | -      |

**Table S3:** Percent inhibition of binding of bis-ANS to H $\gamma$ D, M $\gamma$ S and OPJ- M $\gamma$ S by Drugs

| Drugs | WT-H $\gamma$ D | WT-M $\gamma$ S | OPJ-M $\gamma$ S |
|-------|-----------------|-----------------|------------------|
| M     | 4.28±0.0003     | 1.95±0.0017     | 3.48±0.0010      |
| X     | 15.16±0.0010    | 10.17±0.0014    | 2.45±0.00075     |
| B     | 27.86±0.0009    | 11.94±0.0018    | 11.83±0.00091    |
| D     | 34.5±0.0006     | 19.49±0.0018    | 7.76±0.00097     |
| C     | 43.82±0.0012    | 27.16±0.0011    | 20.28±0.00089    |
| G     | 44.64±0.0011    | 40.72±0.0008    | 31.62±0.00057    |

**Table S4:** List of primers used for making WT-H $\gamma$ D mutants

| Mutants | Forward Primer                         | Reverse Primer                     |
|---------|----------------------------------------|------------------------------------|
| W43R    | 5'- CGGCTGCCGCATGCTCTATGAGCAGCCC -3'   | 5'-AGCATGCGGCAGCCGCTGTCCACGCG-3'   |
| R14C    | 5'-CCAGGGCTGCCACTATGAATGCAGCAGCGACC-3' | 5'-TAGTGGCAGCCCTGGAAGCCCCGGTC-3'   |
| R58H    | 5'-CTTCCTGCACCGCGGCGACTATGCCGACC-3'    | 5'-CCGCGGTGCAGGAAGTACTGGAGGCCCG-3' |

**Table S5:** Percent inhibition of heat mediated aggregation of WT-M $\gamma$ S and OPJ-M $\gamma$ S by 500  $\mu$ M of selected drugs at the end point of turbidity assay (72 °C, 20 min)

| Drugs | Percent Inhibition |                 |
|-------|--------------------|-----------------|
|       | WT-MGS             | OPJ-MGS         |
| C     | 80.5 $\pm$ 1.87    | 82.0 $\pm$ 0.49 |
| G     | 80.5 $\pm$ 2.45    | 91.6 $\pm$ 0.09 |
| X     | 39.7 $\pm$ 3.42    | 60.9 $\pm$ 0.80 |
| D     | 80.4 $\pm$ 0.44    | 85.1 $\pm$ 0.68 |
| B     | 55.5 $\pm$ 8.03    | 77.6 $\pm$ 0.21 |
| M     | 46.3 $\pm$ 4.23    | 33.6 $\pm$ 2.36 |

**Table S6:** Radius of the aggregates of WT-M $\gamma$ S with and without drug C, G and M at the end point of thermal stress (72 °C, 20 min) as observed from DLS spectra

| Sample        | Radius (nm) |        | Percent Mass |        |
|---------------|-------------|--------|--------------|--------|
|               | Peak 1      | Peak 2 | Peak 1       | Peak 2 |
| CON (No Heat) | 2.1         | 9.0    | 92.2         | 7.8    |
| CON (Heat)    | 5789.7      | -      | 100          | -      |
| C             | 86.6        |        | 100          | -      |
| G             | 77.9        | -      | 100          | -      |
| M             | 622.0       | 6200.7 | 1.4          | 98.6   |

**Table S7:** Radius of the aggregates of OPJ-M $\gamma$ S with and without drug C, G and M at the end point of thermal stress (72 °C, 20 min) as observed from DLS spectra

| Sample        | Radius (nm) |        | Percent Mass |        |
|---------------|-------------|--------|--------------|--------|
|               | Peak 1      | Peak 2 | Peak 1       | Peak 2 |
| CON (No Heat) | 1.9         | 7.4    | 95.2         | 4.8    |
| CON (Heat)    | 2400.8      | -      | 100          | -      |
| C             | 21.9        | 358.7  | 32           | 68     |
| G             | 79.3        | -      | 100          | -      |
| M             | 53.1        | 5594.1 | 0            | 100    |

**Table S8:** Melting temperatures of WT-M $\gamma$ S and OPJ- M $\gamma$ S with and without drug C, G and M calculated from the thermal unfolding curves. N-ter and C-ter refer to N- and C-terminal domain

| Drug | T <sub>m</sub> (°C) |         |       |
|------|---------------------|---------|-------|
|      | WT-MGS              | OPJ-MGS |       |
|      |                     | N-ter   | C-ter |
| Con  | 70                  | 48      | 63    |
| C    | 72                  | 50      | 69    |
| G    | 73                  | 50      | 70    |
| M    | 68                  | 48      | 63    |

**Table S9:** Trypsin miscleavage sites detected in H $\gamma$ D (2.5mg/ml) incubated with 400uM Drug G with 5%DMSO for 20 min at 72°C compared to no drug treatment with 5% DMSO.

| Number  | Peptide                              | Site       | Mw(obs)   | Mw(cal)   | Error (Da) |
|---------|--------------------------------------|------------|-----------|-----------|------------|
| 4-15    | ITLYEDRGFQGR                         | R10        | 1454.7369 | 1454.7387 | -0.0018    |
| 60-77   | RGDYADHQQWMGLSDSVR                   | R60        | 2120.9566 | 2120.9567 | -0.0001    |
| 78-89   | SCRLIPHSGSHR                         | R80        | 1349.6838 | 1349.6855 | -0.0018    |
| 118-142 | FNEIHSLNVLEGSWVLYELSNYRGR            | R140       | 2955.5072 | 2995.5061 | 0.0011     |
| 118-153 | FNEIHSLNVLEGSWVLYELSNYRGR-QYLLMPGDYR | R140, R142 | 4232.1028 | 4232.1022 | 0.0006     |
| 154-174 | YQDWGATNARVGLRRVIDFS                 | R168, R169 | 2411.2218 | 2411.2215 | 0.0004     |

**Table S10: Summary of screened compounds whose activity either worsened or improved the turbidity of bovine gamma crystallins exposed to H<sub>2</sub>O<sub>2</sub> with or without added thermal stress**

Drugs found to worsen solution turbidity at 600 nm (N=241)  
 Drugs found to mildly improve solution turbidity at 600 nm (n=105)  
 Drugs found to more strongly improve solution turbidity at 600nm when 10 min heat shock at 72°C is added (N=30)

| MOLENAME                                        | Tradename | cas#       | Bioactivity                                               |
|-------------------------------------------------|-----------|------------|-----------------------------------------------------------|
| 0ISOPIMPINELLIN                                 |           | 482-27-9   | antineoplastic, antifungal, antiviral, insect antifeedant |
| 1,4-NAPHTHOQUINONE                              |           | 130-15-4   | antibacterial, antineoplastic                             |
| 1-HYDROXY-3,6,7-TRIMETHOXY-2,8-DIPRENYLXANTHONE |           | 15404-76-9 |                                                           |
| 2',4'-DIHYDROXY-4-METHOXYCHALCONE               |           | 81674-91-1 |                                                           |
| 2,4-DIMETHOXY-2'-HYDROXYCHALCONE                |           | 32272-18-7 | PGE2 inhibitor                                            |

|                                                          |             |                                                    |                                                                                   |
|----------------------------------------------------------|-------------|----------------------------------------------------|-----------------------------------------------------------------------------------|
| 2-MERCAPTOBENZOTHAZOLE                                   |             | 149-30-4                                           | antibacterial, antifungal.<br>inhibits dopamine beta-<br>hydroxylase              |
| 2-METHOXYRESORCINOL                                      |             | 29267-67-2                                         |                                                                                   |
| 3,4',5,6,7-PENTAMETHOXYFLAVONE                           |             | 4472-73-5                                          |                                                                                   |
| 3,4'-DIHYDROXYFLAVONE                                    |             | 14919-49-4                                         |                                                                                   |
| 3,4'-DIMETHOXYFLAVONE                                    |             |                                                    |                                                                                   |
| 3',6-DIHYDROXYFLAVONE                                    |             | 71592-46-6                                         |                                                                                   |
| 3,7-DIHYDROXYFLAVONE                                     |             | 492-00-2                                           |                                                                                   |
| 3,7-DIMETHOXYFLAVONE                                     |             | 20950-52-1                                         |                                                                                   |
| 3-beta-ACETOXYALLOPREG-16-EN-20-ONE                      |             |                                                    |                                                                                   |
| 3beta-HYDROXYCHOL-5-ENIC ACID                            |             | 5255-17-4                                          |                                                                                   |
| 3-HYDROXYFLAVONE                                         |             | 577-85-5                                           |                                                                                   |
| 4-ACETOXYPHENOL                                          |             | 3233-32-7                                          | antioxidant                                                                       |
| 4'-METHOXYFLAVONE                                        |             | 4143-74-2                                          |                                                                                   |
| 4-NONYLPHENOL                                            |             | 104-40-5                                           | weevil pheromone, shows<br>estrogenic activity                                    |
| 5,4'-DIMETHOXY-7-HYDROXYFLAVONE                          |             |                                                    |                                                                                   |
| 6,2'-DIMETHOXYFLAVONE                                    |             |                                                    |                                                                                   |
| 6,3'-DIMETHOXYFLAVONE                                    |             | 79786-40-6                                         |                                                                                   |
| 6-HYDROXYFLAVONE                                         |             | 6665-83-4                                          | anxiolytic                                                                        |
| 7,4'-DIMETHOXYISOFLAVONE                                 |             |                                                    |                                                                                   |
| 7-DEACETYLKHIVORIN                                       |             |                                                    |                                                                                   |
| 7-DESACETOXY-6,7-DEHYDROGEDUNIN                          |             |                                                    |                                                                                   |
| 7-DESHYDROXYPYROGALLIN-4-CARBOXYLIC ACID<br>ABIETIC ACID |             | 514-10-3                                           | GPR-35 agonist<br><br>antiinflammatory,<br>testosterone 5a reductase<br>inhibitor |
| ACEDAPSONE                                               | HANSOLAR    | 77-46-3                                            | antimalarial, leprostatic                                                         |
| ACETOXOLONE                                              |             |                                                    | antiulcer                                                                         |
| ACETYL ISOGAMBOGIC ACID                                  |             |                                                    |                                                                                   |
| ACITRETIN                                                | SORIATANE   | 55079-83-9                                         | antipsoriatic                                                                     |
| ACRIFLAVINIUM HYDROCHLORIDE                              | PANFLAVIN   | 8063-24-9                                          | antiinfective, intercalating<br>agent                                             |
| ACRISORCIN                                               | AKRINOL     | 7527-91-5                                          | antifungal                                                                        |
| ADRENALONE HYDROCHLORIDE                                 | STRYPHNASAL | 62-13-5                                            | adrenergic (ophthalmic)                                                           |
| AGARIC ACID                                              |             | 666-99-9                                           | antiperspirant                                                                    |
| AGELASINE                                                |             |                                                    | cytotoxic, antineoplastic;<br>mixed isomers                                       |
| ALBENDAZOLE                                              | ALBENZA     | 54965-21-8                                         | anthelmintic                                                                      |
| ALEURETIC ACID                                           |             | 533-87-9                                           |                                                                                   |
| ALGINIC ACID [Mol Wt ~200,000; monomers<br>shown]        |             | 9005-32-7                                          | emulsifying agent                                                                 |
| ALLYLESTRENOL                                            |             | 432-60-0                                           | progestogen                                                                       |
| ALLYLTHIOUREA                                            |             | 109-57-9                                           | chelating agent                                                                   |
| alpha-MANGOSTIN                                          |             | 6147-11-1                                          | antifungal, antilarval                                                            |
| alpha-TOCHOPHERYL ACETATE [4mM]                          | EPHYNAL     | 58-95-7                                            | vitamin E                                                                         |
| alpha-TOXICAROL (dl)                                     |             | 82-09-7                                            | psychotoxin                                                                       |
| AMINACRINE                                               | MONACRIN    | 90-45-9, 134-50-9<br>[aminacrine<br>hydrochloride] | local antiseptic                                                                  |
| AMINOETHYLISOTHIOUREA<br>DIHYDROBROMIDE                  |             | 56-10-0                                            | NOS inhibitor                                                                     |
| AMIODARONE HYDROCHLORIDE                                 | CORDARONE   | 1951-25-3                                          | adrenergic agonist, coronary<br>vasodilator, Ca channel<br>blocker                |
| AMITRIPTYLINE HYDROCHLORIDE                              | ELAVIL      | 549-18-8                                           | antidepressant                                                                    |

|                                        |             |                                                         |                                                                                                                               |
|----------------------------------------|-------------|---------------------------------------------------------|-------------------------------------------------------------------------------------------------------------------------------|
| AMODIAQUINE DIHYDROCHLORIDE            | CAMOQUIN    | 6398-98-7, 69-44-3 [anhydrous], 86-42-0 [amodiaquine]   | antimalarial                                                                                                                  |
| AMOXAPINE                              | ASENDIN     | 14028-44-5                                              | antidepressant, inhibits norepinephrine uptake                                                                                |
| ANTHOTHECOL                            |             | 10410-83-0                                              | antimalarial                                                                                                                  |
| ANTIAROL                               |             | 642-71-7                                                |                                                                                                                               |
| ANTIMONY POTASSIUM TARTRATE TRIHYDRATE |             | 28300-74-5                                              | antischistosomal                                                                                                              |
| APIOLE                                 |             | 523-80-8                                                | antipyretic, diuretic, insecticide                                                                                            |
| APIXABAN                               | ELIQUIS     | 503612-47-3                                             | Factor Xa inhibitor, anticoagulant, antithrombotic                                                                            |
| A POMORPHINE HYDROCHLORIDE             | APOKYN      | 41372-20-7, 314-19-2 [anhydrous], 58-00-4 [apomorphine] | dopamine receptor agonist, antiparkinsonian, erectile dysfunction therapy                                                     |
| APRAMYCIN SULFATE                      |             | 65710-07-8                                              | antibacterial; LD50(iv) 280mg/kg(mouse)                                                                                       |
| ARACHIDONIC ACID                       |             | 506-32-1                                                | stimulates NO biosynthesis, vasodilator                                                                                       |
| ARTHONOIC ACID                         |             | 25556-24-5                                              |                                                                                                                               |
| ASCORBYL PALMITATE                     | EMPROVE     | 137-66-6                                                | antioxidant                                                                                                                   |
| ATAZANAVIR SULFATE                     | REYATAZ     | 229975-97-7                                             | antiviral, HIV protease inhibitor                                                                                             |
| ATORVASTATIN CALCIUM                   | LIPITOR     | 134523-03-8                                             | antihyperlipidemic, HMGCoA reductase inhibitor                                                                                |
| ATOVAQUONE                             | MEPRON      | 95233-18-4                                              | antipneumocystic, antimalarial                                                                                                |
| AURIN TRICARBOXYLIC ACID               |             | 4431-00-9                                               | endonuclease inhibitor; apoptosis inhibitor, topoisomerase II inhibitor                                                       |
| AVOBENZONE                             | PARSOL      | 70356-09-1                                              | sunscreen                                                                                                                     |
| AVOCADENE                              |             | 24607-08-7                                              | antifungal                                                                                                                    |
| AVOCADENE ACETATE                      |             | 24607-09-8                                              | antifungal, plant growth inhibitor                                                                                            |
| AVOCADENOFURAN                         |             | 25346-24-1                                              |                                                                                                                               |
| AVOCADYNE ACETATE                      |             | 24607-06-5                                              | antifungal                                                                                                                    |
| AZTREONAM                              | AZACTAM     | 78110-38-0                                              | antibacterial                                                                                                                 |
| BAZEDOXIFENE ACETATE                   |             | 198481-33-3                                             | antiosteoporotic                                                                                                              |
| BENDAMUSTINE HYDROCHLORIDE             | RIBOMUSTINE | 3543-75-7                                               | antineoplastic                                                                                                                |
| BENSERAZIDE HYDROCHLORIDE              | MADOPA      | 322-35-0                                                | decarboxylase inhibitor                                                                                                       |
| BENZALKONIUM CHLORIDE HYDRATE          | ROCCAL      | 8001-54-5                                               | antiinfective (topical)                                                                                                       |
| BENZBROMARONE                          | DESURIC     | 3562-84-3                                               | uricosuric                                                                                                                    |
| BENZETHONIUM CHLORIDE                  | PHEMERIDE   | 121-54-0                                                | antiinfective (topical)                                                                                                       |
| BENZYDAMINE HYDROCHLORIDE              | TANTUM      | 132-69-4                                                | analgesic, antipyretic, antiinflammatory                                                                                      |
| BERBAMINE HYDROCHLORIDE                |             | 6078-17-7                                               | antihypertensive, skeletal muscle relaxant                                                                                    |
| beta-CAROTENE [2mM]                    | SOLATENE    | 7235-40-7                                               | antioxidant; provitamin A                                                                                                     |
| BETULIN                                |             | 473-98-3                                                | antineoplastic, antihyperlipidemia                                                                                            |
| BILIRUBIN                              |             | 635-65-4                                                | antioxidant                                                                                                                   |
| 2',2'-BISEPIGALLOCATECHIN DIGALLATE    |             |                                                         |                                                                                                                               |
| BITHIONOL                              | LOROTHIDOL  | 97-18-7                                                 | anthelmintic, antiseptic                                                                                                      |
| BIXIN                                  |             | 39937-23-0                                              | antineoplastic                                                                                                                |
| BRAZILEIN                              |             | 600-76-0                                                | antineoplastic, induces apoptosis, antiinflammatory                                                                           |
| BRAZILIN                               |             | 474-07-7                                                | inhibits platelet aggregation, PLA2, PKC, protein phosphatase, insulin receptor kinase, nitric oxide synthase, antineoplastic |
| BRONOPOL                               | BRONOSOL    | 52-51-7                                                 | antiinfective                                                                                                                 |
| BROXALDINE                             |             | 3684-48-6                                               | antiinfective, antifungal                                                                                                     |

|                                     |            |                                         |                                                              |
|-------------------------------------|------------|-----------------------------------------|--------------------------------------------------------------|
| BRUCINE                             |            | 4845-99-2, 357-57-3<br>[brucine]        | central stimulant                                            |
| BUSSEIN                             |            | 41060-14-4                              |                                                              |
| CABAZITAXEL                         | JEVTANA    | 183133-96-2                             | antineoplastic                                               |
| CANDESARTAN CILEXTIL                | ATACAND    | 139481-59-7                             | angiotensin 1 receptor antagonist                            |
| CANDICIDIN                          | VANOVID    | 1403-17-4                               | antifungal                                                   |
| CANRENONE                           |            | 976-71-6                                | aldosterone antagonist;<br>antifibrogenic                    |
| CAPTAN                              |            | 133-06-2                                | fungicide, antibacterial                                     |
| CARAPIN                             |            | 3463-88-5                               |                                                              |
| CARAPIN-8(9)-ENE                    |            |                                         |                                                              |
| CARBAZOCHROME                       | ADRENOXYL  | 69-81-8                                 | hemostatic agent                                             |
| CARBENOXOLONE SODIUM                | SANODIN    | 7421-40-1, 5697-56-3<br>[carbenoxolone] | antiinflammatory, antisecretory, antiulcer                   |
| CARBIMAZOLE                         |            | 22232-54-8                              | antithyroid                                                  |
| CARVEDILOL                          | COREG      | 72956-09-3                              | beta-adrenergic blocker                                      |
| CARVEDILOL PHOSPHATE                | COREG CR   | 610309-89-2                             | antianginal, antihypertensive                                |
| CEDRELONE                           |            | 1254-85-9                               |                                                              |
| CEFTAZIDIME                         | TAZIDIME   | 72558-82-8                              | antibacterial                                                |
| CEFUROXIME SODIUM                   | ZINACEF    | 56238-63-2                              | antibacterial                                                |
| CELASTROL                           |            | 34157-83-0                              | antineoplastic, NO synthesis inhibitor, chaperone stimulant  |
| CELECOXIB                           | CELEBREX   | 169590-42-5                             | antiarthritic, cyclooxygenase2 inhibitor                     |
| CEPHALOTHIN SODIUM                  | KEFLIN     | 58-71-9, 153-61-7<br>[cephalothin]      | antibacterial                                                |
| CETALKONIUM CHLORIDE                | ZETTYN     | 122-18-9                                | antinfected                                                  |
| CETYLPIRIDINIUM CHLORIDE            | CEPACOL    | 6004-24-6, 123-03-5<br>[anhydrous]      | antinfected (topical)                                        |
| CHAULMOOGRIC ACID                   |            | 502-30-7                                | antibacterial (mycobacteria), antileprotic                   |
| CHENODIOL                           | CHENIX     | 474-25-9                                | anticholelithogenic, antilipemic agent                       |
| CHICAGO SKY BLUE                    |            | 2610-05-1                               | inhibitor of aminoacid uptake                                |
| CHINIOFON                           | YATREN     | 8002-90-2                               | antiprotozoal, amebicide                                     |
| CHLORAMPHENICOL PALMITATE           | CHLOROPAL  | 530-43-8                                | antibacterial, antirickettsial                               |
| CHLORAZANIL HYDROCHLORIDE           | DAQUIN     | 2019-25-2                               | diuretic                                                     |
| CHLORHEXIDINE DIHYDROCHLORIDE       | LISIUM     | 3697-42-5, 55-56-1<br>[chlorhexidine]   | antibacterial (topical), disinfectant                        |
| CHLORMIDAZOLE                       |            | 3689-76-7                               | antifungal                                                   |
| CHLOROPHYLLIDE Cu COMPLEX Na SALT   | CHLORESIUM | 11006-34-1                              | antineoplastic                                               |
| CHLOROTHALONIL                      |            | 1897-45-6                               | antifungal, pesticide, acaricide                             |
| CHLORPROMAZINE HYDROCHLORIDE        | THORAZINE  | 69-09-0                                 | antiemetic, antipsychotic                                    |
| CHOLECALCIFEROL                     |            | 67-97-0                                 | vitamin D3                                                   |
| CHRYSENEQUINONE                     |            | 100900-16-1                             | cytotoxic, antineoplastic, aldehyde dehydrogenase inhibitor  |
| CHRYSIN                             |            | 480-40-0                                | diuretic                                                     |
| CHRYSIN DIMETHYL ETHER              |            | 21392-57-4                              |                                                              |
| CISPLATIN                           | PLATINOL   | 15663-27-1                              | antineoplastic, convulsant                                   |
| CLINDAMYCIN PALMITATE HYDROCHLORIDE | CLEOCIN    | 25507-04-4                              | antibacterial, inhibits protein synthesis                    |
| CLIOQUINOL                          | VIOFORM    | 130-26-7                                | antiseptic, antiamebic                                       |
| CLOFAZIMINE                         | LAMPRENE   | 2030-63-9                               | antibacterial, antilepreitic, antituberculosis               |
| CLOFOCTOL                           | OCTOPHENE  | 37693-01-9                              | antibacterial                                                |
| CLOPERASTINE HYDROCHLORIDE          | NOTUSSIL   | 3703-76-2                               | antitussive                                                  |
| CLOSANTEL                           | FLUKIVER   | 57808-65-8                              | anthelmintic                                                 |
| CURCUMIN                            |            | 458-37-7                                | antiedemic, antiinflammatory, bile stimulant; antibacterial, |

|                              |            |                                                                      |                                                                                                     |
|------------------------------|------------|----------------------------------------------------------------------|-----------------------------------------------------------------------------------------------------|
| CYCLOSPORINE                 | SANDIMMUNE | 59865-13-3                                                           | antifungal,<br>lipo/cyclooxygenase inhibitor<br>immunosuppressant                                   |
| CYPROHEPTADINE HYDROCHLORIDE | PERIACTIN  | 969-33-5                                                             | H1-antihistamine, antipruritic                                                                      |
| CYSTAMINE DIHYDROCHLORIDE    |            | 56-17-7                                                              | hepatoprotectant, t-<br>glutaminase inhibitor, heat<br>shock protein promoter,<br>caspase inhibitor |
| CYSTEAMINE HYDROCHLORIDE     |            | 60-23-1                                                              | antiulcerogenic, depigmentation,<br>radiation protectant<br>cathartic                               |
| DANTHRON                     | DORBANE    | 117-10-2                                                             |                                                                                                     |
| DANTROLENE SODIUM            | DANTRIUM   | 24868-20-0, 14663-<br>23-1 [anhydrous],<br>7261-97-4<br>[dantrolene] | muscle relaxant (skeletal)                                                                          |
| DEACETYLGEDUNIN              |            |                                                                      |                                                                                                     |
| DECOQUINATE [5mM]            |            | 18507-89-6                                                           | coccidiostat                                                                                        |
| DEGUELIN(-)                  |            | 522-17-8                                                             | antineoplastic, antiviral,<br>insecticide, ornithine<br>decarboxylate inhibitor                     |
| DEMETHYLNIBILETIN            |            | 2174-59-6                                                            |                                                                                                     |
| DEOXYGEDUNIN                 |            | 21963-95-1                                                           | neuroprotective, anti-<br>depressant. learning<br>enhancement                                       |
| DEQUALINIUM CHLORIDE         | FLUOMIZIN  | 522-51-0, 6707-58-0<br>[dequalinium]                                 | antiinfectant, antineoplastic                                                                       |
| DESLOTATIDINE                | CLARINEX   | 100643-71-8                                                          | H1-antihistamine                                                                                    |
| DIACERIN                     |            | 13739-02-1                                                           | antiinflammatory                                                                                    |
| DICHLORISONE ACETATE         | DILODERM   | 79-61-8                                                              | antipruritic                                                                                        |
| DICLAZURIL                   | CLINACOX   | 101831-37-2                                                          | coccidiostat                                                                                        |
| DICLORALUREA                 |            | 116-52-9                                                             | antibacterial                                                                                       |
| DICTAMNINE                   |            | 484-29-7                                                             | antifungal, vasal relaxant,<br>smooth muscle contractant<br>antiproliferative                       |
| DIFFRACTAIC ACID             |            | 436-32-8                                                             |                                                                                                     |
| DIFLUBENZURON                | ECTOGUARD  | 35367-38-7                                                           | insecticide, inhibits<br>melanosome synthesis                                                       |
| DIHYDROATRANORIN             |            | 69168-12-3                                                           |                                                                                                     |
| DIHYDROCELASTROL             |            |                                                                      |                                                                                                     |
| DIHYDROCELASTRYL DIACETATE   |            |                                                                      | chaperone stimulant                                                                                 |
| DIHYDROFISSINOLIDE           |            |                                                                      |                                                                                                     |
| DIHYDROGAMBOGIC ACID         |            |                                                                      |                                                                                                     |
| DIHYDROGEDUNIN               |            |                                                                      |                                                                                                     |
| DIHYDROROTENONE              |            | 6659-45-6                                                            | acaricide, ectoparasiticide,<br>antineoplastic, mitochondrial<br>poison, binds tubulin              |
| DIMESNA                      |            | 16208-51-8                                                           | antineoplastic, uroprotectant                                                                       |
| DIPERODON HYDROCHLORIDE      |            | 537-12-2                                                             | analgesic, anesthetic                                                                               |
| DOBUTAMINE HYDROCHLORIDE     | DOBUTREX   | 49745-95-1, 34368-<br>04-2 [dobutamine]                              | cardiotonic                                                                                         |
| DOCUSATE SODIUM              | DOC-Q-LACE | 577-11-7                                                             | stool softener                                                                                      |
| DOPAMINE HYDROCHLORIDE       | INTROPIN   | 62-31-7, 51-61-6<br>[dopamine]                                       | cardiotonic, antihypotensive                                                                        |
| DROPROPIZINE                 |            | 17692-31-8                                                           | antitussive                                                                                         |
| DROXYDOPA                    | DOPS       | 23651-95-8                                                           | neurogenic hypotension,<br>antiparkinsonian                                                         |
| ECONAZOLE NITRATE            | SPECTAZOLE | 68797-31-9, 27220-<br>47-9 [econazole]                               | antifungal                                                                                          |
| EMODIN                       |            | 518-82-1                                                             | antibacterial, antineoplastic,<br>cathartic, tyrosine kinase<br>inhibitor                           |
| ENOXACIN                     | PENETREX   | 74011-58-8                                                           | antibacterial                                                                                       |
| ENOXOLONE                    |            | 471-53-4                                                             | antitussive, antiinflammatory,<br>antibacterial                                                     |
| EPIANDROSTERONE              |            | 481-29-8                                                             | weak androgen                                                                                       |



|                                 |                |                                      |                                                                         |
|---------------------------------|----------------|--------------------------------------|-------------------------------------------------------------------------|
| EPIGALLOCATECHIN-3-MONOGALLATE  |                | 989-51-5                             |                                                                         |
| ERDOSTEINE                      | SECRESOLV      | 84611-23-4                           | mucoytic                                                                |
| ERGOCALCIFEROL                  | DRISDOL        | 50-14-6                              | antirachitic vitamin, Vitamin D2                                        |
| ERYTHROMYCIN ESTOLATE           | ILOSONE        | 134-36-1, 114-07-8<br>[erythromycin] | antibacterial                                                           |
| ERYTHROSINE SODIUM              |                | 16423-68-0                           | color additive                                                          |
| ESCIN                           |                | 6805-41-0                            | membrane permeabilizer                                                  |
| ESTROPIPATE                     | OGEN           | 7280-37-7                            | estrogen                                                                |
| ETHACRIDINE LACTATE             | RIVANOL        | 1837-57-6; 6402-23-9<br>(hydrate)    | antiseptic, abortifacient                                               |
| ETHACRYNIC ACID                 | EDECRIN        | 58-54-8                              | diuretic                                                                |
| ETHANOLAMINE OLEATE             | ETHAMOLIN      | 2272-11-9                            | sclerosing agent                                                        |
| ETHAVERINE HYDROCHLORIDE        | ETHAQUIN       | 985-13-7, 486-47-5<br>[base]         | antispasmodic                                                           |
| ETHISTERONE                     |                | 434-03-7                             | progestogen                                                             |
| ETHYNODIOL DIACETATE            |                | 297-76-7                             | progestin                                                               |
| EVANS BLUE                      |                | 314-13-6                             | glutamate uptake inhibitor, AMPA blocker                                |
| FAST GREEN FCF                  |                | 2353-45-9                            | carcinogen, mutagen, inhibitor of synaptic activity, immune suppressant |
| FLAVONE                         |                | 525-82-6                             |                                                                         |
| FLUVASTATIN SODIUM              | LESCOL         | 93957-55-2                           | antihyperlipidemic, HMGCoA reductase inhibitor                          |
| FORMONONETIN                    |                | 485-72-3                             | phytoestrogen                                                           |
| FUMARPROTOCETRARIC ACID         |                | 489-50-9                             | antibacterial                                                           |
| GALLAMINE TRIETHIODIDE          | FLAXADIL       | 65-29-2, 153-76-4<br>[gallamine]     | muscle relaxant (skeletal)                                              |
| GALLIC ACID                     |                | 149-91-7                             | antineoplastic, astringent, antibacterial                               |
| GAMBOGIC ACID                   |                | 2752-65-0                            | antiinflammatory, cytotoxic, inhibits HeLa cells in vitro;              |
| GARCINOLIC ACID                 |                | 91893-83-3                           | antineoplastic, neuraminidase inhibitor                                 |
| GARDENIN B                      |                | 2798-20-1                            |                                                                         |
| GEDUNOL                         |                |                                      |                                                                         |
| GLIQUIDONE                      | GLURENORM      | 33342-05-1                           | antidiabetic                                                            |
| GOSSYPOL                        |                | 303-45-7                             | antispermatogenic, antineoplastic, antiHIV                              |
| GOSSYPOL-ACETIC ACID COMPLEX    |                |                                      | male contraceptive, dehydrogenase inhibitor, antimalarial               |
| GRAMICIDIN (gramicidin A shown) |                | 1405-97-6                            | antibacterial                                                           |
| GUANFACINE HYDROCHLORIDE        | TENEX          | 29110-48-3                           | antihypertensive                                                        |
| HAEMATOPORPHYRIN                |                | 14459-29-1                           | antidepressant, antineoplastic                                          |
| HAEMATOXYLIN                    |                | 517-28-2                             |                                                                         |
| HAEMATOXYLIN PENTAACETATE       |                |                                      |                                                                         |
| HARMANE                         |                | 486-84-0                             | intercalating agent, sedative                                           |
| HARMOL                          |                |                                      | antineoplastic, apoptosis inducer                                       |
| HEMATEIN                        |                | 475-25-2                             | CK2 inhibitor, antineoplastic, TNFa inhibitor, antiinflammatory         |
| HETEROPEUCENIN, METHYL ETHER    |                | 26213-95-6                           |                                                                         |
| HEXACHLOROPHENE                 | PHISOHEX       | 70-30-4                              | antiinfective (topical)                                                 |
| HEXETIDINE                      | STERISIL       | 141-94-6                             | antifungal                                                              |
| HOMIDIUM BROMIDE                |                | 1239-45-8                            | antiprotozoal, intercalates with DNA                                    |
| HOMOSALATE                      | EUSOLEX        | 118-56-9                             | UV screen, analgesic                                                    |
| HYCANTHONE                      |                | 3105-97-3                            | anthelmintic, hepatotoxic                                               |
| HYDROQUINONE                    | SOLAQUIN FORTE | 123-31-9                             | depigmentor, antioxidant                                                |
| ICARIIN                         |                | 489-32-7                             | hepatoprotective                                                        |

|                                                    |                  |                                                           |                                                                               |
|----------------------------------------------------|------------------|-----------------------------------------------------------|-------------------------------------------------------------------------------|
| IDEBENONE                                          |                  | 58186-27-9                                                | cognition enhancer, nootropic                                                 |
| IDOXURIDINE                                        | DENDRID          | 54-42-2                                                   | antiviral                                                                     |
| INDOLE-3-CARBINOL                                  |                  | 700-06-1                                                  | antineoplastic; inhibitor of Amyloid-beta deposition<br>plant growth promoter |
| INDOXYL ACETATE                                    |                  |                                                           |                                                                               |
| IODOFORM                                           | Kri1             | 75-47-8                                                   | antiseptic, disinfectant                                                      |
| <b>IRIGENOL HEXAACETATE</b>                        |                  |                                                           |                                                                               |
| ISOCONAZOLE NITRATE                                | FAZOL            | 24168-96-5                                                | antibacterial, antifungal                                                     |
| ISOFLUPREDONE ACETATE                              | PREDEF           | 338-98-7                                                  | antiinflammatory                                                              |
| ISOOSAJIN                                          |                  | 5745-54-0                                                 |                                                                               |
| ISOPOMIFERIN                                       |                  |                                                           | antioxidant                                                                   |
| ISOPROPAMIDE IODIDE                                | DARBID           | 71-81-8, 7492-32-2<br>[isopropamide]                      | anticholinergic                                                               |
| ITRACONAZOLE HYDROCHLORIDE                         | SPORANOX         | 84625-61-6                                                | antifungal                                                                    |
| IZALPININ                                          |                  | 480-14-4                                                  | inhibits bladder contractility                                                |
| JUGLONE                                            |                  | 481-39-0                                                  | antineoplastic, antifungal,<br>antioxidant, Pin 1 inhibitor                   |
| <b>KOPARIN</b>                                     |                  | <b>65048-75-1</b>                                         | <b>antiinflammatory</b>                                                       |
| <b>LACCAIC ACID A</b>                              |                  | <b>15979-35-8</b>                                         | <b>inhibits DNA<br/>methyltransferase I</b>                                   |
| <b>LEVODOPA</b>                                    | <b>LARODOPA</b>  | <b>59-92-7</b>                                            | <b>antiparkinsonian</b>                                                       |
| LEVOFLOXACIN                                       | LEVAQUIN         | 138199-71-0                                               | antibacterial                                                                 |
| LITHOCHOLIC ACID                                   |                  | 434-13-9                                                  | LD50(mouse) 3900 mg/kg po                                                     |
| LOBARIC ACID                                       |                  | 522-53-2                                                  | antibacterial                                                                 |
| LOMERIZINE HYDROCHLORIDE                           | TERRANAS         | 101477-55-8                                               | antimigraine, cerebral<br>vasodilator, Ca channel<br>blocker                  |
| LOPERAMIDE HYDROCHLORIDE                           | IMODIUM          | 34552-83-5, 53179-<br>11-6 [loperamide]                   | Ca channel blocker                                                            |
| LOPINAVIR                                          |                  | 192725-17-0                                               | antiviral; HIV protease<br>inhibitor                                          |
| <b>LORGLUMIDE SODIUM</b>                           |                  | <b>97964-56-2 (acid)</b>                                  | <b>CCK receptor antagonist</b>                                                |
| <b>MANGOSTIN TRIMETHYL ETHER</b>                   |                  |                                                           |                                                                               |
| <b>MECLOFENAMATE SODIUM</b>                        | <b>MECLOMEN</b>  | <b>6385-02-0</b>                                          | <b>antiinflammatory, antipyretic</b>                                          |
| MEFLOQUINE HYDROCHLORIDE                           | LARIAM           | 53230-10-7                                                | antimalarial                                                                  |
| MENAQUINONE-4                                      |                  |                                                           | antioxidant, alkaline<br>phosphatase enhancer                                 |
| MENTHYL BENZOATE                                   |                  | 71617-14-6                                                |                                                                               |
| <b>MESALAMINE</b>                                  | <b>ASACOL</b>    | <b>89-57-6</b>                                            | <b>antiinflammatory</b>                                                       |
| MESTRANOL                                          |                  | 72-33-3                                                   | estrogen, with progesterone<br>as oral contraceptive                          |
| METERGOLINE                                        |                  | 17692-51-2                                                | analgesic, antipyretic                                                        |
| <b>METHACYCLINE HYDROCHLORIDE</b>                  | <b>RNDOMYCIN</b> | <b>3963-95-9, 914-00-1<br/>[methacycline]</b>             | <b>antibacterial</b>                                                          |
| METHIMAZOLE                                        | TAPAZOLE         | 60-56-0                                                   | antihyperthyroid                                                              |
| <b>METHYL 7-DESHYDROXYPYROGALLIN-4-CARBOXYLATE</b> |                  | <b>77-41-8</b>                                            |                                                                               |
| <b>METHYL GAMBOGATE METHYL ETHER</b>               |                  |                                                           |                                                                               |
| METHYLBENZETHONIUM CHLORIDE                        | DELAVAN          | 1320-44-1, 25155-<br>18-4 [anhydrous]                     | antiinfective                                                                 |
| METHYLENE BLUE                                     |                  | 7220-79-3                                                 | antimethemoglobinemic,<br>cyanide antidote                                    |
| METITEPINE MESYLATE                                |                  | 20229-30-5                                                | 5HT1&2 receptor antagonist                                                    |
| METRONIDAZOLE                                      | FLAGYL           | 443-48-1, 69198-10-<br>3 [metronidazole<br>hydrochloride] | antiprotozoal                                                                 |
| <b>MINOCYCLINE HYDROCHLORIDE</b>                   | <b>SOLODYN</b>   | <b>13614-98-7, 10118-<br/>90-8 [minocycline]</b>          | <b>antibacterial</b>                                                          |
| MITOXANTRONE HYDROCHLORIDE                         | NOVANTRONE       | 70476-82-3, 65271-<br>80-9 [base]                         | antineoplastic                                                                |
| <b>MONTELUKAST SODIUM</b>                          | <b>SINGULAIR</b> | <b>151767-02-1</b>                                        | <b>leucotriene antagonist,<br/>antiasthmatic</b>                              |
| MUNDULONE                                          |                  | 481-94-7                                                  | antineoplastic                                                                |

|                                 |                 |                                     |                                                            |
|---------------------------------|-----------------|-------------------------------------|------------------------------------------------------------|
| MYRICETIN                       |                 | 529-44-2                            | antiHIV, topoisomerase II inhibitor                        |
| NAFTOPIDIL                      | AVISHOT         | 57149-07-2                          | antihypertensive, alpha-blocker, 5HT1a agonist             |
| NICLOSAMIDE                     | NICLOSIDE       | 50-65-7                             | anthelmintic, teniacide                                    |
| NILVADIPINE                     | ESCOR           | 75530-68-6                          | antihypertensive, antianginal                              |
| NITARSONE                       | HISTOSTAT       | 98-72-6                             | antiprotozoal                                              |
| NITAZOXANIDE                    | ALINIA          | 55981-09-4                          | antiparasitic                                              |
| NITROXOLINE                     | ENTEROCOL       | 4008-48-4                           | antibacterial                                              |
| NORGESTIMATE                    |                 | 35189-28-7                          | progestin                                                  |
| NORHARMAN                       |                 | 244-63-3                            | plant growth inhibitor; mutagen                            |
| NORTRIPTYLINE HYDROCHLORIDE     | AVENTYL         | 894-71-3, 72-69-5 [nortriptyline]   | antidepressant                                             |
| NYSTATIN                        | MYCOSTATIN      | 114-90-9                            | antifungal, binds to membrane sterols                      |
| OBTUSAQUINONE                   |                 | 21105-15-7                          | antifungal, antineoplastic                                 |
| OCTINOXATE                      |                 | 5466-77-3                           | sunscreen, UV-B absorber                                   |
| OCTOCRYLENE                     | EUSOLEX         | 6197-30-4                           | sunscreen                                                  |
| OLTIPRAZ                        |                 | 64224-21-1                          | schistosomicide, antineoplastic                            |
| OMEGA-3-ACID ESTERS (EPA shown) | LOVAZA          | 86227-47-6                          | hypolipidemic                                              |
| OSAJIN                          |                 | 482-53-1                            | antioxidant, cardioprotectant                              |
| OXICONAZOLE NITRATE             | OXISTAT         | 64211-46-7                          | antifungal                                                 |
| OXIDOPAMINE HYDROCHLORIDE       |                 | 28094-15-7                          | adrenergic agonist (ophthalmic)                            |
| OXYCLOZANIDE                    | ZANIL           | 2277-92-1                           | anthelmintic                                               |
| OXYPHENONIUM BROMIDE            | ANTRENYL        | 50-10-2                             | anticholinergic, anticonvulsant                            |
| OXYTETRACYCLINE                 | TERRAMYCIN      | 6153-64-6, 79-57-2 [anhydrous]      | antibacterial                                              |
| PAROXETINE HYDROCHLORIDE        | PAXIL           | 78246-49-8, 61869-08-7(base)        | antidepressant                                             |
| PATULIN                         |                 | 149-29-1                            | antibacterial, antitumor                                   |
| PAZUFLOXACIN MESYLATE           | PAZUCROSS       | 163680-77-1; 127045-41-4            | antibacterial                                              |
| PENFLURIDOL                     | SEMAP           | 26864-56-2                          | antipsychotic                                              |
| PERHEXILINE MALEATE             | PEXID           | 6724-53-4, 6621-47-2 [perhexiline]  | coronary vasodilator                                       |
| PERSEITOL                       |                 | 527-06-0                            | inhibitor of IImtI enzyme                                  |
| PHENOLSULFONPHTHALEIN           | PHENOL RED      | 143-74-8                            | diagnostic aid [renal]                                     |
| PHENOTHIAZINE                   | NEMAZINE        | 92-94-2                             | anthelmintic                                               |
| PHENOXYBENZAMINE HYDROCHLORIDE  | DIBENZYLIN      | 63-92-3, 59-96-1 [phenoxybenzamine] | alpha adrenergic blocker                                   |
| PHENYL AMINOSALICYLATE          | PHENYPASTEBAMIN | 133-11-9                            | antibacterial (tuberculostatic)                            |
| PHENYLMERCURIC ACETATE          | AGROSAN         | 62-38-4                             | antifungal, antimicrobial                                  |
| PICROPODOPHYLLIN                |                 | 477-47-4                            | Insulin growth factor 1 receptor inhibitor, antineoplastic |
| PIMETHIXENE MALEATE             |                 | 314-03-4                            | H1 antihistamine                                           |
| PIMOBENDAN                      | VETMEDIN        | 74150-27-9                          | PDE3 inhibitor, vasodilator, cardiotonic                   |
| PIMOZIDE                        | ORAP            | 2062-78-4                           | antipsychotic                                              |
| PIPAMPERONE                     | DIPIPERON       | 1893-33-0                           | antipsychotic                                              |
| PIZOTYLINE MALATE               | SANDOMIGRAN     | 5189-11-7                           | 5HT antagonist, antimigraine                               |
| POMIFERIN                       | POMIFITRIN      | 572-03-2                            | antioxidant, renal protectant                              |
| POMIFERIN DIMETHYL ETHER        |                 |                                     |                                                            |
| POMIFERIN TRIACETATE            |                 |                                     |                                                            |
| PREGNENOLONE SUCCINATE          | FORMULA-405     | 4598-67-8                           | glucocorticoid, antiinflammatory                           |
| PROBUCOL                        | LORELCO         | 23288-49-5                          | antihyperlipidemic                                         |
| PROCAINE HYDROCHLORIDE          | NOVOCAIN        | 51-05-8, 59-46-1 [procaine]         | anesthetic (local)                                         |

|                                 |            |                                                              |                                                                            |
|---------------------------------|------------|--------------------------------------------------------------|----------------------------------------------------------------------------|
| PROCHLORPERAZINE EDISYLATE      | COMPAZINE  | 1257-78-9, 84-02-6<br>[prochlorperazine<br>maleate], 58-38-8 | antiemetic, antipsychotic,<br>treatment of vertigo                         |
| PROCYCLIDINE HYDROCHLORIDE      | KEMADRIN   | 1508-76-5, 77-37-2<br>[prochlorperazine]<br>[procyclidine]   | anticholinergic                                                            |
| PROFLAVINE HEMISULFATE          |            | 553-30-0, 1811-28-5                                          | antiseptic                                                                 |
| PROMETHAZINE HYDROCHLORIDE      | PHENERGAN  | 58-33-3, 60-87-7<br>[promethazine]                           | antihistamine                                                              |
| PROPOXUR                        | BAYGON     | 114-26-1                                                     | insecticide                                                                |
| PROPYLTHIOURACIL                | PROPACIL   | 51-52-5                                                      | antihyperthyroid                                                           |
| PTAEROXYLIN                     |            | 14729-11-4                                                   |                                                                            |
| PTEROSTILBENE                   |            | 537-42-8                                                     | antifungal                                                                 |
| PURPURIN                        |            | 81-54-9                                                      | xanthin oxidase inhibitor,<br>irritant                                     |
| PYRITINOL                       |            | 1098-97-1                                                    | cognition enhancer, nootropic                                              |
| PYRONARIDINE TETRAPHOSPHATE     |            | 76748-86-2                                                   | antimalarial                                                               |
| PYRVINIUM PAMOATE               | POVAN      | 3546-41-6                                                    | anthelmintic, androgen<br>receptor blocker                                 |
| QUERCETIN                       |            | 117-39-5, 6151-25-<br>3(hydrate)                             | capillary protectant,<br>antioxidant. antineoplastic,<br>anti-HIV          |
| QUINALIZARIN                    |            | 81-61-8                                                      | antiviral, HIV-1 integrase<br>inhibitor                                    |
| RACECADOTRIL                    | TIORFAN    | 81110-73-8                                                   | antidiarrheal                                                              |
| RAFOXANIDE                      | FLUKANIDE  | 22662-39-1                                                   | anthelmintic                                                               |
| RALOXIFENE HYDROCHLORIDE        | EVISTA     | 82640-04-8                                                   | antiestrogen                                                               |
| RAMIPRIL                        | ALTACE     | 87333-19-5                                                   | antihypertensive, ACE<br>inhibitor                                         |
| RESORCINOL MONOACETATE          | EURESOL    | 102-29-4                                                     | antiseborrheic, antipruritic                                               |
| RETINYL PALMITATE               |            | 79-81-2                                                      | provitamin,<br>antixerophthalmic                                           |
| RHODOCLADONIC ACID              |            | 26984-15-6                                                   |                                                                            |
| RIFAPENTINE                     | PRIFTIN    | 61379-65-5                                                   | antibacterial                                                              |
| RIFAXIMIN                       | XIFAXAN    | 80621-81-4                                                   | antibacterial, RNA synthesis<br>inhibitor                                  |
| RITONAVIR                       | NORVIR     | 155213-67-5                                                  | antiviral                                                                  |
| ROBENIDINE HYDROCHLORIDE        |            | 25875-50-7                                                   | coccidiostat                                                               |
| ROTENONE                        |            | 83-79-4                                                      | acaricide, ectoparasiticide,<br>antineoplastic, mitochondrial<br>poison    |
| ROTENONIC ACID, METHYL ETHER    |            |                                                              |                                                                            |
| SALICYLANILIDE                  | SALINIDOL  | 87-17-2                                                      | antipyretic, fungicide                                                     |
| SANGUINARIUM CHLORIDE           | VIADENT    | 5578-73-4                                                    | antineoplastic, antiplaque<br>agent                                        |
| SECURININE                      |            | 5610-40-2                                                    | GABAA receptor blocker,<br>CNS stimulant                                   |
| SELENOMETHIONINE                |            | 1464-42-2                                                    | contrast agent                                                             |
| SENNOSIDE A                     | GLYSENNID  | 81-27-6                                                      | cathartic                                                                  |
| SODIUM TETRADECYL SULFATE       | SOTRADECOL | 139-88-8                                                     | sclerosing agent                                                           |
| STRYCHNINE METHIODIDE           |            |                                                              | neuromuscular blocker                                                      |
| SULCONAZOLE NITRATE             | EXELDERM   | 61318-91-0, 61318-<br>90-9 [sulconazole]                     | antifungal                                                                 |
| SULFISOXAZOLE ACETYL            | GANTRISIN  | 80-74-0                                                      | antibacterial                                                              |
| SURAMIN HEXASODIUM              | ANTRYPOL   | 129-46-4, 145-63-1<br>[suramin]                              | antiprotozoal, trypanocidal,<br>antiviral                                  |
| TACRINE HYDROCHLORIDE           | COGNEX     | 1684-40-8                                                    | anticholinesterase, cognitive<br>adjuvant, K channel blocker               |
| TANNIC ACID                     |            | 1401-55-4                                                    | nonspecific enzyme/receptor<br>blocker                                     |
| TANSHINONE IIA SULFONATE SODIUM |            |                                                              | free radical scavenger                                                     |
| TAPENTADOL HYDROCHLORIDE        | NUCYNTA    | 175591-23-8                                                  | analgesic, norepinephrine<br>uptake blocker, mu-opioid<br>receptor agonist |

|                                          |             |                                                                                          |                                                 |
|------------------------------------------|-------------|------------------------------------------------------------------------------------------|-------------------------------------------------|
| TEGASEROD MALEATE                        | ZELNORM     | 189188-57-6                                                                              | 5HT4 receptor agonist,<br>peristaltic stimulant |
| TELMISARTAN                              | MICARDIS    | 144701-48-4                                                                              | antihypertensive, angiotensin<br>II blocker     |
| TENIPOSIDE                               | VUMON       | 29767-20-2                                                                               | antineoplastic                                  |
| TENOXCAM                                 | ALGANEX     | 59804-37-4                                                                               | antiinflammatory                                |
| TEPOXALIN                                | ZUBRIN      | 103475-41-8                                                                              | antipsoriatic                                   |
| TERCONAZOLE                              | TERAZOL     | 67915-31-5                                                                               | antifungal                                      |
| TERFENADINE                              | SELDANE     | 50679-08-8                                                                               | H1 antihistamine,<br>nonsedating                |
| TETRAMIZOLE HYDROCHLORIDE                | ANTHELVET   | 5086-74-8                                                                                | anthelmintic                                    |
| THEAFLAVIN MONOGALLATES                  |             |                                                                                          |                                                 |
| THIMEROSAL                               | MERTHIOLATE | 54-64-8                                                                                  | antiinfective, preservative                     |
| THIOCTIC ACID                            | BILETAN     | 1077-24-7                                                                                | hepatoprotectant                                |
| THIOGUANINE                              | TABLOID     | 154-42-7, 5580-03-0<br>[hemihydrate]                                                     | antineoplastic, purine<br>antimetabolite        |
| THIRAM                                   | REZIFILM    | 137-26-8                                                                                 | antifungal                                      |
| THYMOQUINONE                             |             | 490-91-5                                                                                 | antineoplastic, antioxidant                     |
| TIOGUANINE                               | LANVIS      | 154-42-7                                                                                 | antineoplastic, anti-ulcerative<br>colitis      |
| TIOXOLONE                                | STEPIN      | 4991-65-5                                                                                | antiseborrheic                                  |
| TOLNAFTATE                               | TINACTIN    | 2398-96-1                                                                                | antifungal                                      |
| TOLONIUM CHLORIDE                        | TOLAZUL     | 92-31-9                                                                                  | hemostatic                                      |
| TOREMIFENE CITRATE                       | FARESTON    | 89778-27-8                                                                               | antineoplastic, anti-estrogen                   |
| TORSEMIDE                                | DEMADEX     | 56211-40-6                                                                               | diuretic, inhibits Na/K/2Cl<br>carrier system   |
| TOSUFLOXACIN TOLUENESULFONATE<br>HYDRATE | TOSUXACIN   | 115964-29-9                                                                              | antibacterial                                   |
| TOTAROL                                  |             | 511-15-9                                                                                 | antimicrobial, neuroprotective                  |
| TRIFLUOPERAZINE HYDROCHLORIDE            | STELAZINE   | 440-17-5                                                                                 | antipsychotic                                   |
| TRIOXSALEN                               | TRISORALEN  | 3902-71-4                                                                                | melanizing agent,<br>antipsoriatic              |
| TUBOCURARINE CHLORIDE<br>PENTAHYDRATE    | TUBARINE    | 6989-98-6, 57-94-3<br>[anhydrous], 41354-<br>45-4 [replaced], 57-<br>95-4 [tubocurarine] | muscle relaxant (skeletal)                      |
| URSOLIC ACID                             |             | 77-52-1                                                                                  | diuretic, antineoplastic,<br>antiulcer          |
| UTILIN                                   |             | 31218-22-1                                                                               |                                                 |
| VALACYCLOVIR HYDROCHLORIDE               | VALTREX     | 124832-27-5                                                                              | antiviral                                       |
| VORTIOXETINE HYDROBROMIDE                | BRINTELLIX  | 508233-74-7                                                                              | antidepressant                                  |

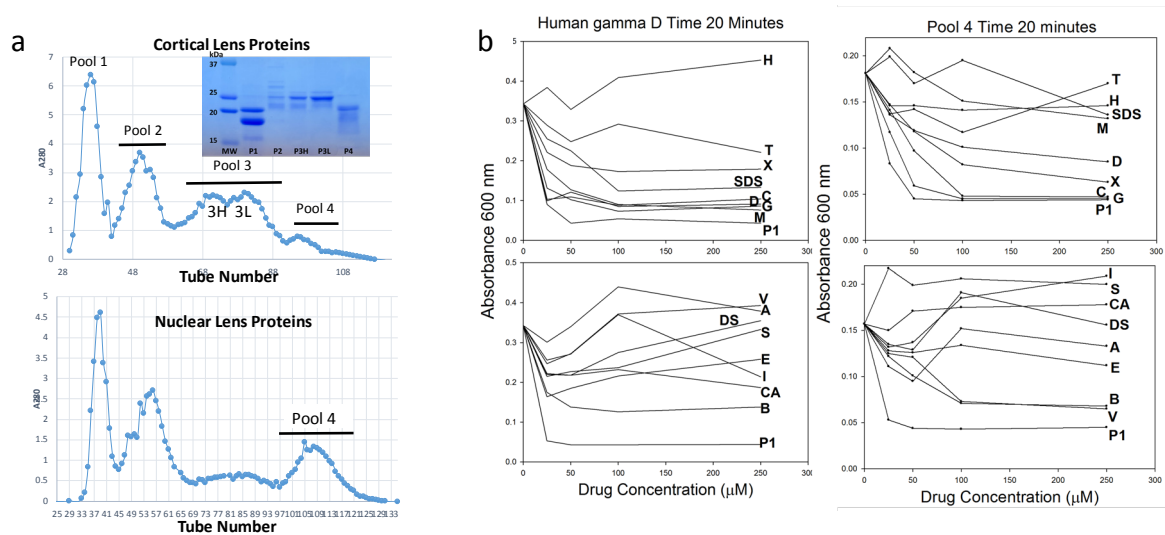

**Fig. S1. a)** Representative Sephadex G-200 gel filtration profile of bovine lens extract fractionated into 4 pools each corresponding to HMW- $\alpha$ -crystallins (Pool 1), LMW- $\alpha$ -crystallins (Pool 2),  $\beta$ H- and  $\beta$ L-crystallins and  $\gamma$ -crystallins (Pool 4) according to Ecroyd et al., respectively. **b)** Effect of concentration on the ability of candidate drugs Hematoporphyrin (H), Tetrasodium sulfate (T), Hexachlorophene (X), Avocadene (V), Chaulmoogric acid (M), Bixin (B), Closantel (C), Gambogic acid (G), Dihydrogambogic acid (D), Chaulmoogric acid (M), Sodium Dodecyl sulfate (SDS), Docusate sodium (DS), Sennoside A (S), Escin (E), Hematein (I), Citric Acid (CA), Bixin (B) and Bovine  $\alpha$ -crystallin-rich (Pool 1) to inhibit thermal induced aggregation of recombinant human  $\gamma$ D crystallin (WT-H $\gamma$ D) and bovine  $\gamma$ -crystallin-rich Pool 4 (1.5 mg/ml). For comparison with Pool 1 ( $\alpha$ -crystallins) as positive control Pool 1 was tested at 0, 0.25: 1, 0.5:1, 1:1 and 2:1 Pool 1 : Pool 4 molar ratio. This data at highest suppression was used to rank the top seven drugs by efficacy of suppression of thermal induced turbidity (see Fig. 1f and Fig. 1g)

Ref: Ecroyd H, Garvey M, Thorn DC, Gerrard JA, Carver JA Amyloid fibrils from readily available sources: milk casein and lens crystallin proteins. *Methods Mol Biol.* 2013; 996: 103-17. doi: 10.1007/978-1-62703-354-1\_6.

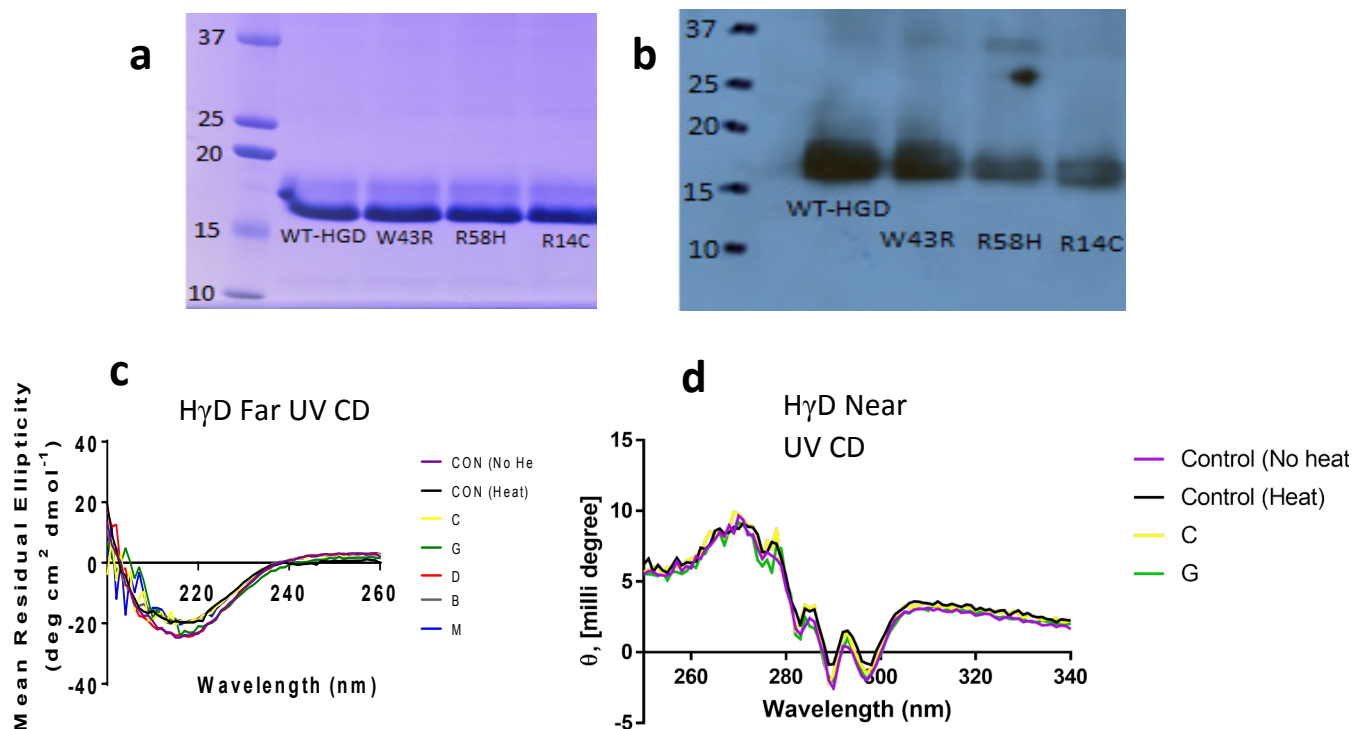

**Fig. S2.** **a)** SDS-Page of purified WT-H $\gamma$ D and its mutants (W43R, R58H, R14C) (20  $\mu$ M protein in 50 mM K<sup>+</sup>PO<sub>4</sub><sup>3-</sup>) **b)** Western blot analysis of purified WT-H $\gamma$ D and its mutants (W43R, R58H, R14C) using anti-WT-H $\gamma$ D primary antibody at 1:5000 dilution. **c)** Far-UV CD spectra of WT-H $\gamma$ D without heat, with heat (72 °C, 20 min) alone and with drugs C, G, D, B, M. WT-H $\gamma$ D and drug concentrations used were 10  $\mu$ M and 100  $\mu$ M respectively in 10 mM sodium phosphate (pH 7.2). **d)** Near-UV spectra of WT-H $\gamma$ D without heat, with heat (72 °C, 20 min) alone and with drugs C and G. Overall the CD results indicate little to no changes in secondary or tertiary structure from heating WT-H $\gamma$ D for 20 min at 72 °C.

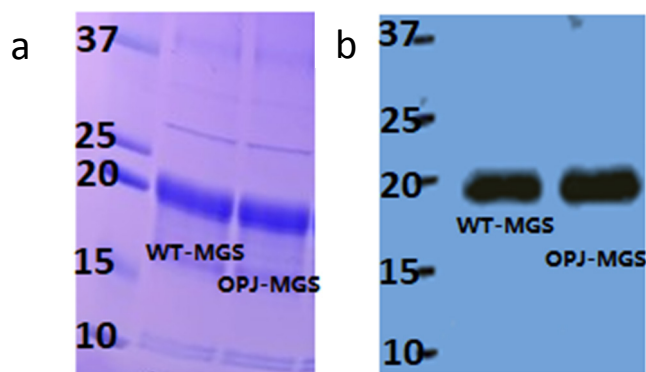

**Fig S3.** **a)** SDS-PAGE and western blot of WT-M $\gamma$ S (first lane) and its mutant OPJ-M $\gamma$ S (second lane) (20  $\mu$ M in 50 mM K<sup>+</sup>PO<sub>4</sub><sup>3-</sup>). **b)** The western blot of WT-M $\gamma$ S and its mutant OPJ-M $\gamma$ S was done using anti-WT-M $\gamma$ S primary antibody at 1:5000 dilution.

# Total mouse $\gamma$ crystallins

a

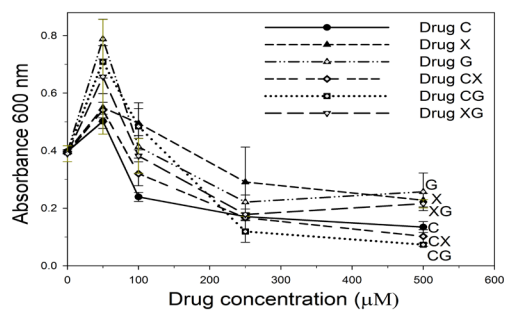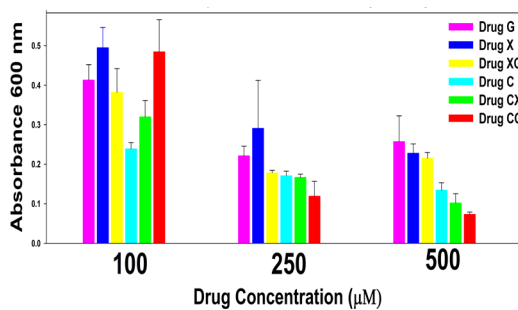

b

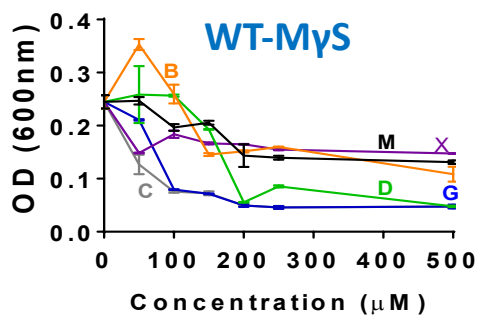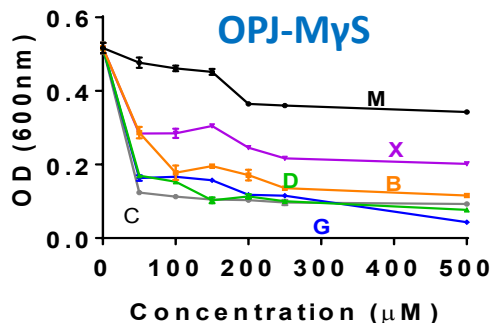

c

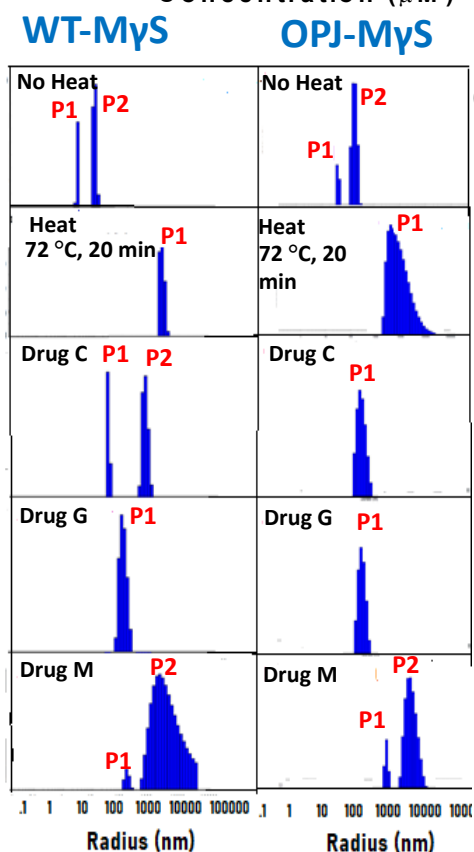

d

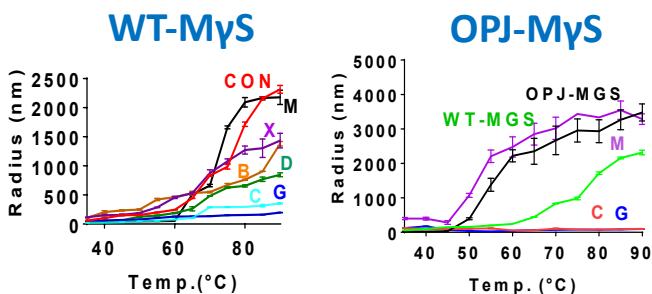

e

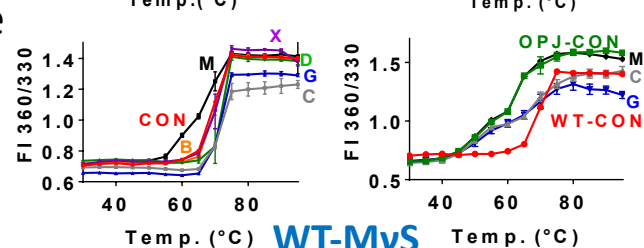

f

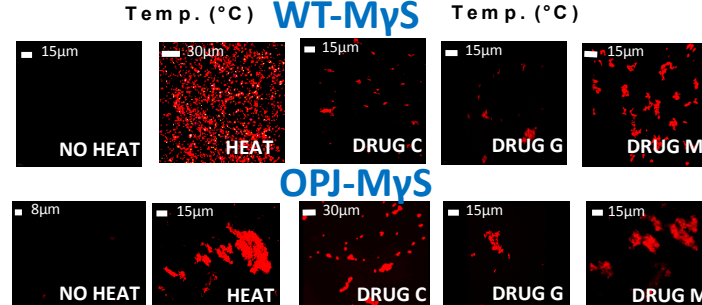

g

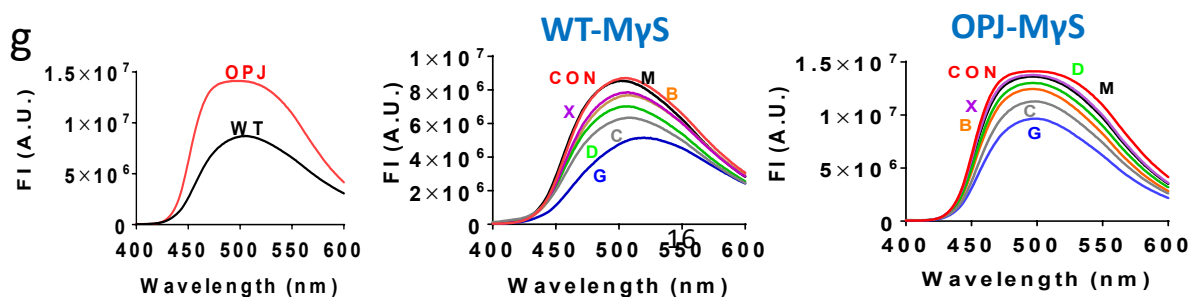



**Fig. S4:** Effects of Closantel, Gambogic acid and other drugs on the biophysical and morphological properties of total mouse gamma crystallins, WT-M $\gamma$ S and its mutant OPJ-M $\gamma$ S exposed to oxidative and thermal stress. **a)** Effect of various concentrations of drugs C, G, X and their combinations against H<sub>2</sub>O<sub>2</sub> mediated oxidation (left panel) and thermal aggregation (72 °C, 20 min) (right panel) against total mouse gamma crystallins (2.5 mg/ml). **b)** Efficacy of drug C, G, C, D, B and M (0  $\mu$ M, 50  $\mu$ M, 100  $\mu$ M, 150  $\mu$ M, 200  $\mu$ M, 250  $\mu$ M, 500  $\mu$ M) in preventing heat mediated aggregation (72 °C, 20 min) of WT-M $\gamma$ S (left panel) and OPJ-M $\gamma$ S (right panel) (45  $\mu$ M each) (Note: mean $\pm$ SD n=6 for 0 $\mu$ M drug, n=2 for all others). **c)** DLS spectra of thermally stressed samples of WT-M $\gamma$ S (left panel) and OPJ-M $\gamma$ S (right panel) (45  $\mu$ M each) alone and with drug C, G and M (400  $\mu$ M). **d)** DLS temperature scan WT-M $\gamma$ S (left panel) and OPJ-M $\gamma$ S (right panel) alone and with drugs (400  $\mu$ M). **e)** Thermal unfolding assay of WT-M $\gamma$ S (left panel) and OPJ-M $\gamma$ S (right panel) (10  $\mu$ M each) alone and with drugs (100  $\mu$ M in DMSO). **f)** Fluorescence microscopic images of thermally stressed samples (72 °C, 20 min) of WT-M $\gamma$ S (upper panel) and OPJ-M $\gamma$ S (lower panel) (50  $\mu$ M of each) alone and with drug C, G and M (400  $\mu$ M) using Nile red. **g,** bis-ANS binding spectra of 10  $\mu$ M of WT-M $\gamma$ S and OPJ-M $\gamma$ S alone (left panel), WT-M $\gamma$ S with drug C, G, X, D, B, M (100  $\mu$ M each) (middle panel) and OPJ-M $\gamma$ S with drug C, G, X, D, B, M (100  $\mu$ M) (right panel). The buffer was 50 mM K<sub>3</sub>PO<sub>4</sub> buffer, pH 7.2. All the experiments were performed in triplicates. The results are mean $\pm$ std of three individual readings, except for 3b).

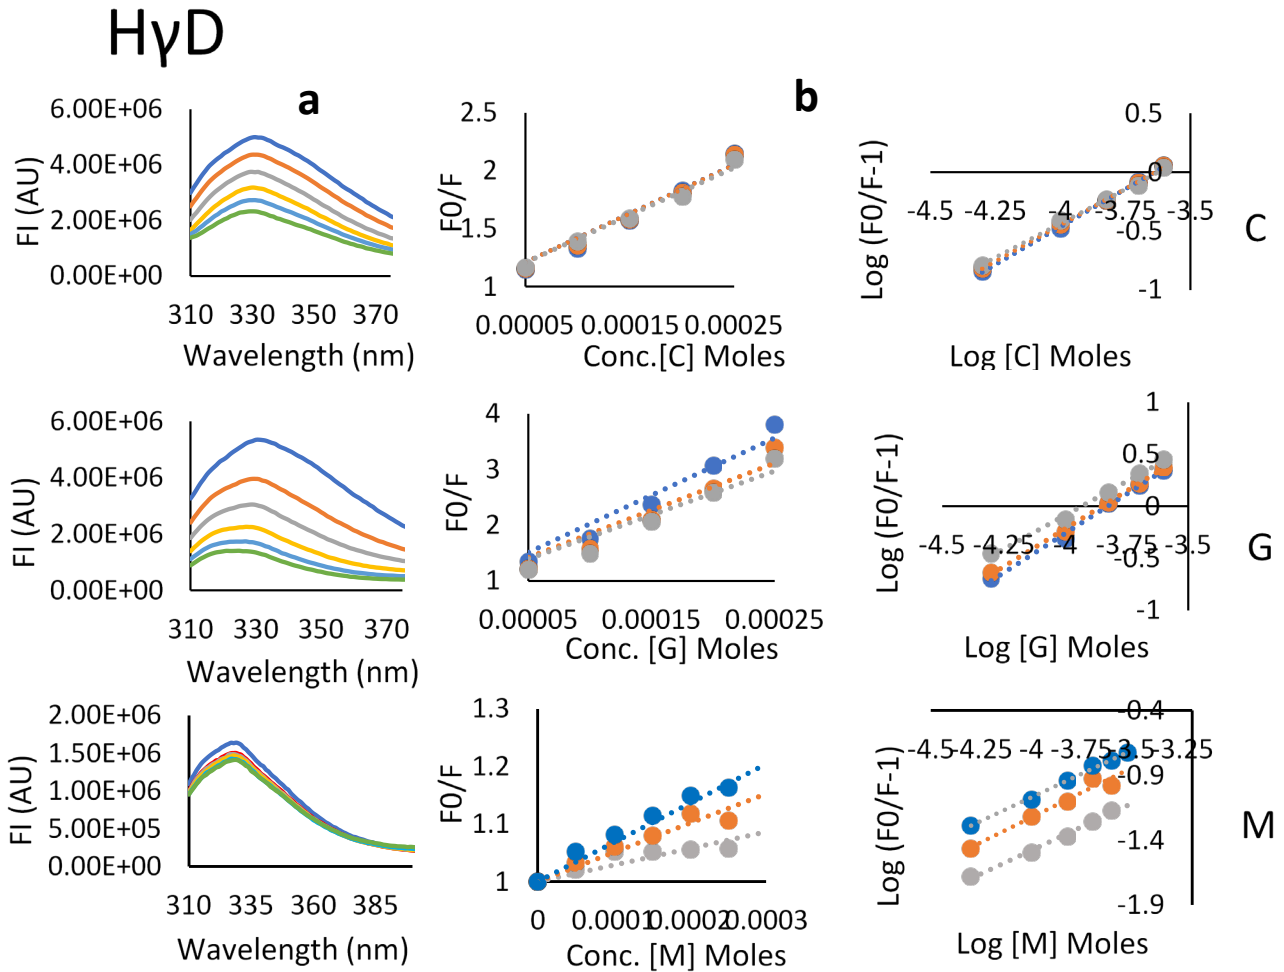

**Fig. S5. a)** Fluorescence emission spectra, **b)** Stern-Volmer plot and **c)** modified Stern-Volmer plot of tryptophan fluorescence quenching of WT-HyD (10  $\mu\text{M}$  in 50 mM  $\text{K}^+\text{PO}_4^{3-}$ ; pH 7.2) by increasing concentrations of drug C, G and M (0  $\mu\text{M}$ : dark blue, 50  $\mu\text{M}$ : red, 100  $\mu\text{M}$ : grey, 150  $\mu\text{M}$ : yellow, 200  $\mu\text{M}$ : light blue, 250  $\mu\text{M}$ : green). Fluorescence emission spectra was recorded at 25  $^\circ\text{C}$ , 30  $^\circ\text{C}$  and 37  $^\circ\text{C}$ . However, spectra of only 25  $^\circ\text{C}$  is shown here. Stern-Volmer and modified Stern-Volmer plots at 25  $^\circ\text{C}$ , 30  $^\circ\text{C}$  and 37  $^\circ\text{C}$  are indicated by blue, red and grey lines respectively.

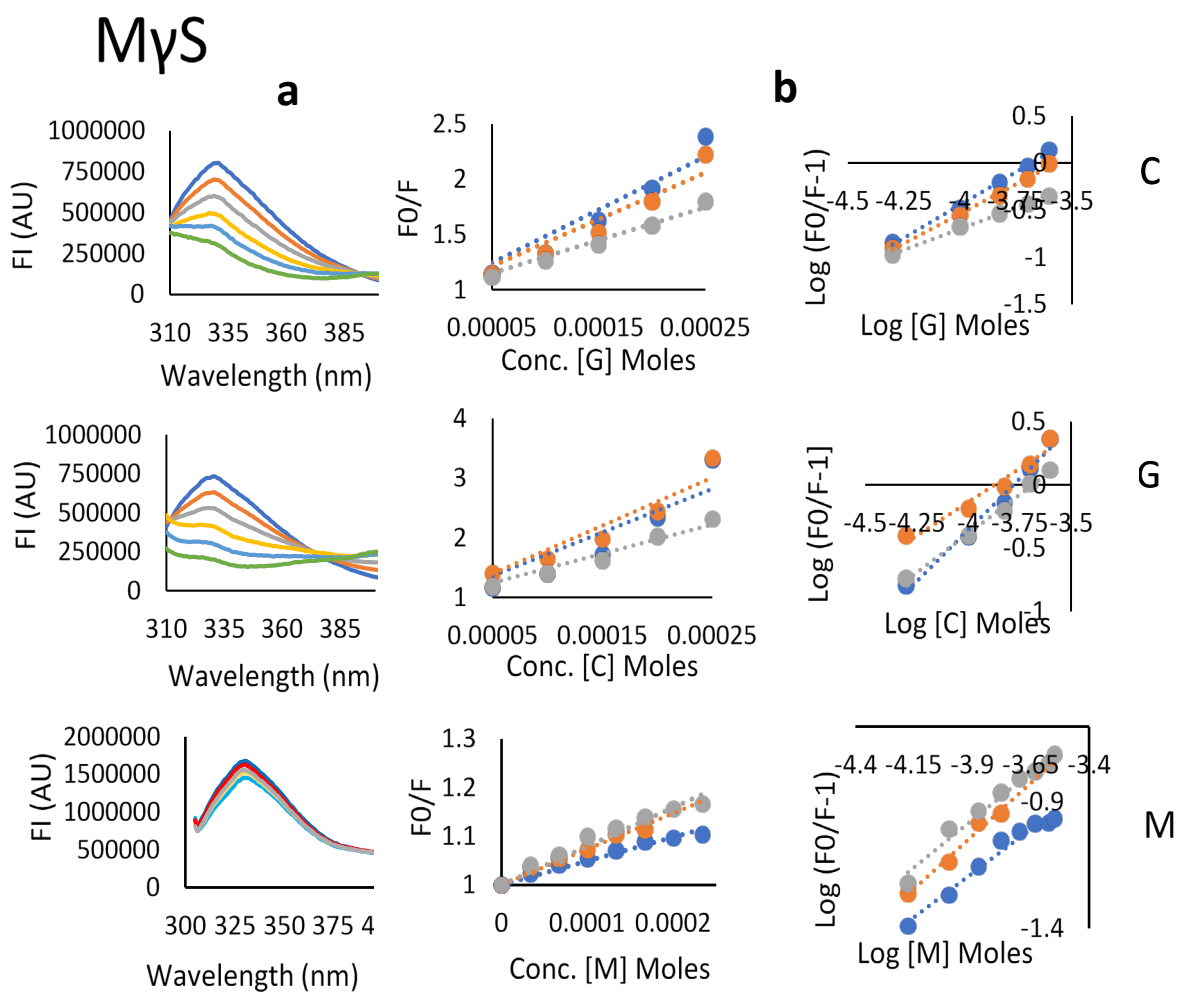

**Fig. S6. a)** Fluorescence emission spectra, **b)** Stern-Volmer plot and **c)** modified Stern-Volmer plot of tryptophan fluorescence quenching of WT-MyS (10  $\mu$ M in 50 mM  $K^+PO_4^{3-}$ ; pH 7.2) by increasing concentrations of drug C, G and M (0  $\mu$ M: dark blue, 50  $\mu$ M: red, 100  $\mu$ M: grey, 150  $\mu$ M: yellow, 200  $\mu$ M: light blue, 250  $\mu$ M: green). Fluorescence emission spectra was recorded at 25  $^\circ$ C, 30  $^\circ$ C and 37  $^\circ$ C. However, spectra of only 25  $^\circ$ C is shown here. Stern-Volmer and modified Stern-Volmer plots at 25  $^\circ$ C, 30  $^\circ$ C and 37  $^\circ$ C are indicated by blue, red and grey lines respectively.

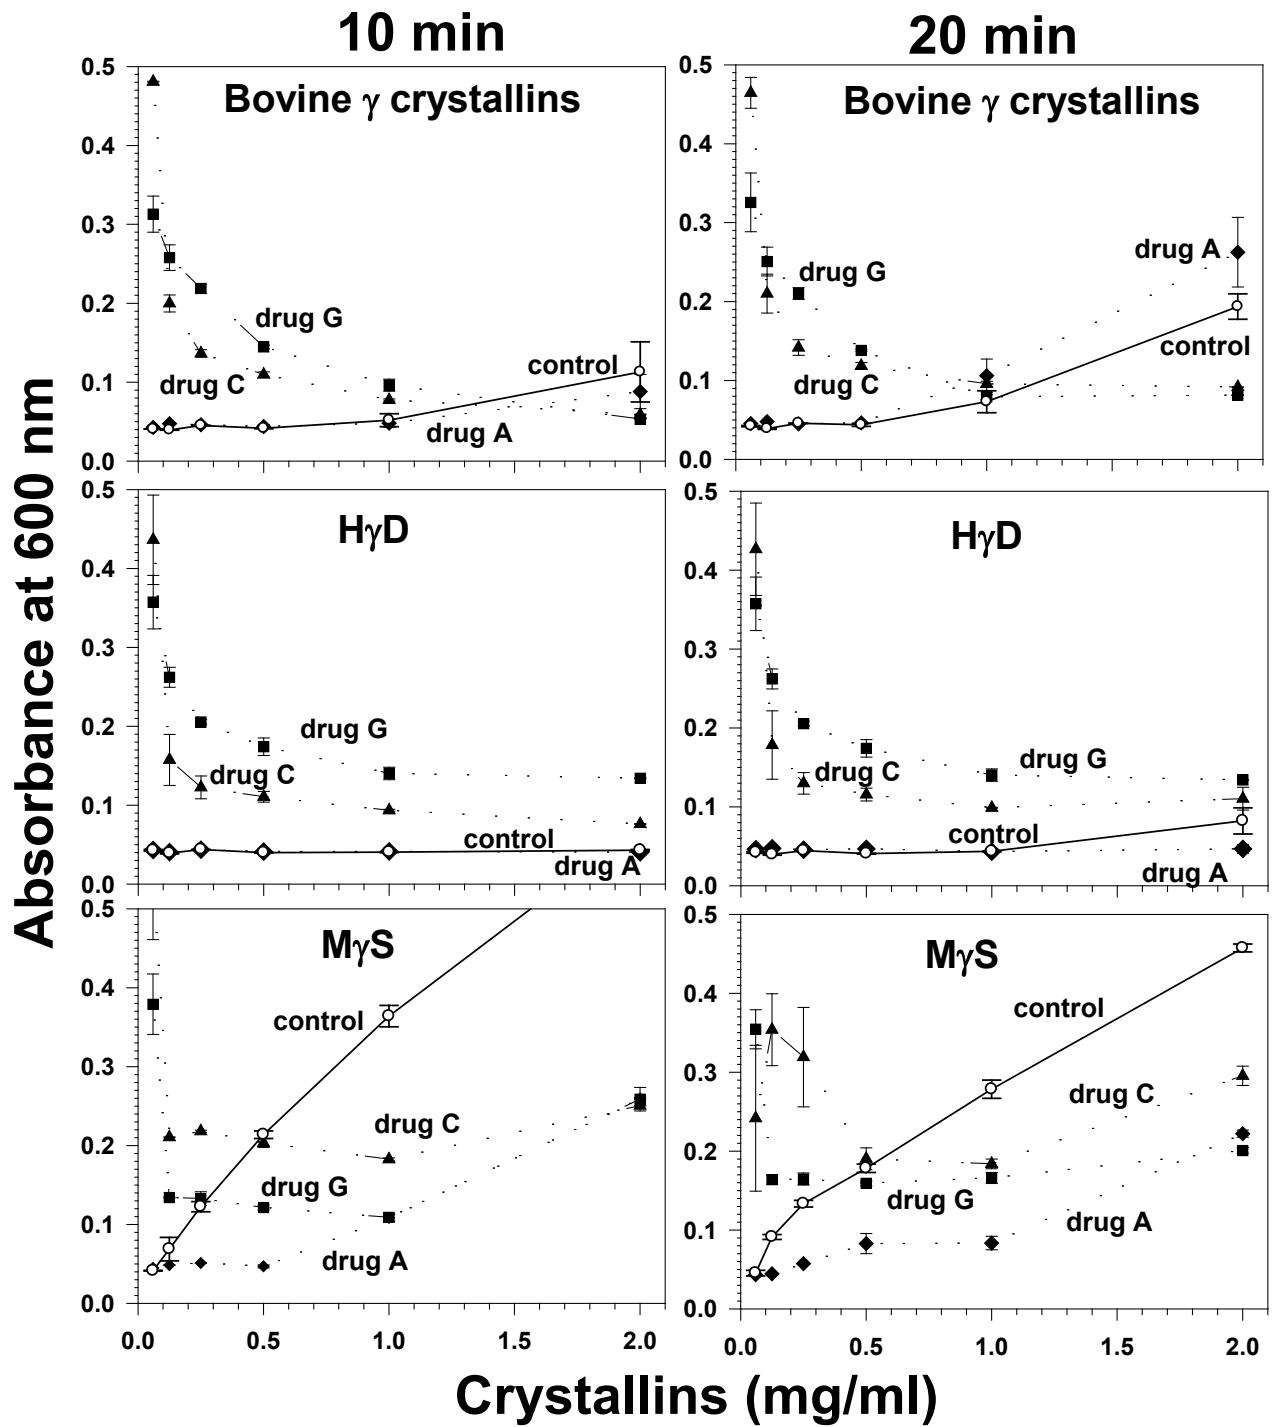

**Fig. S7.** Role of the protein concentration on crystallin turbidity measured at 600nm and its potential suppression by Drugs C, G and A. Total bovine gamma crystallins (BGC) (Pool 4), HyD and MyS were incubated at protein concentrations varying from 0.06 mg/ml to 2.0mg/ml Buffer A, i.e. 50 mM K<sup>+</sup>/PO<sub>4</sub>, pH 7.2) with no or 400  $\mu$ M Drug C and G and A (Agaric Acid) in 5% DMSO. Microtiter plates were incubated first for 10 min at 72°C and re-incubated for 10 min. Absorbance was determined at both 10 and 20 min total incubation time. For full details and discussion see paragraph on Rigor and Reproducibility at the end of the main text.
